# Supplementary material
Source: publisher site journal article supplement (https://www.spandidos-publications.com/6569/downloadSupplementary)

Figure S1. Sequencing primers used for BRAF V600E mutation testing. (A) Forward and (B) reverse BRAF primers. (C) Forward and (D) reverse M13 primers. F, forward; R, reverse.

|   |        |                                                         |
|---|--------|---------------------------------------------------------|
| A | BRAF-F | 5'- TGTAAAACGACGGCCAGTGACCTTCAATGACTTTCTAGTAACTCAGC -3' |
| B | BRAF-R | 5'- CAGGAAACAGCTATGACCACCTAAACTCTTCATAATGCTTGCTCT -3'   |
| C | M13-F  | 5'- TGTAAAACGACGGCCAGT -3'                              |
| D | M13-R  | 5'- CAGGAAACAGCTATGACC -3'                              |

Figure S2. Sequencing traces for Sanger sequencing.  
(A) Positive and (B) negative for the BRAF V600E mutation.

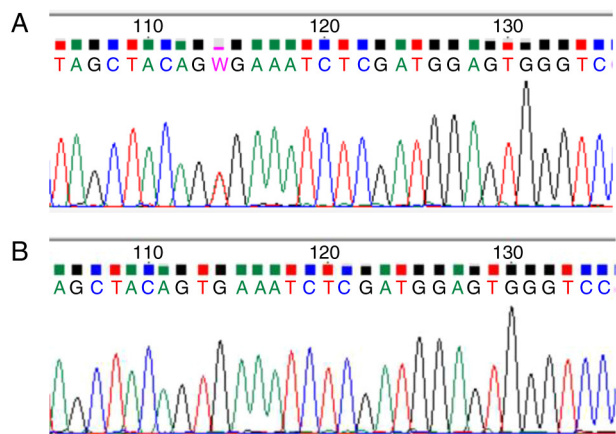

Supplement: Supplementary file 1 [file downloadSupplementary]
